# Supplementary material for: Complex kinetics and residual structure in the thermal unfolding of yeast triosephosphate isomerase
Source: PubMed Central journal article supplement (PMC4558838; doi:10.1186/s12858-015-0049-2), 2015-09-03
Supplement: 12858_2015_49_MOESM1_ESM.pdf [file 12858_2015_49_MOESM1_ESM.pdf]

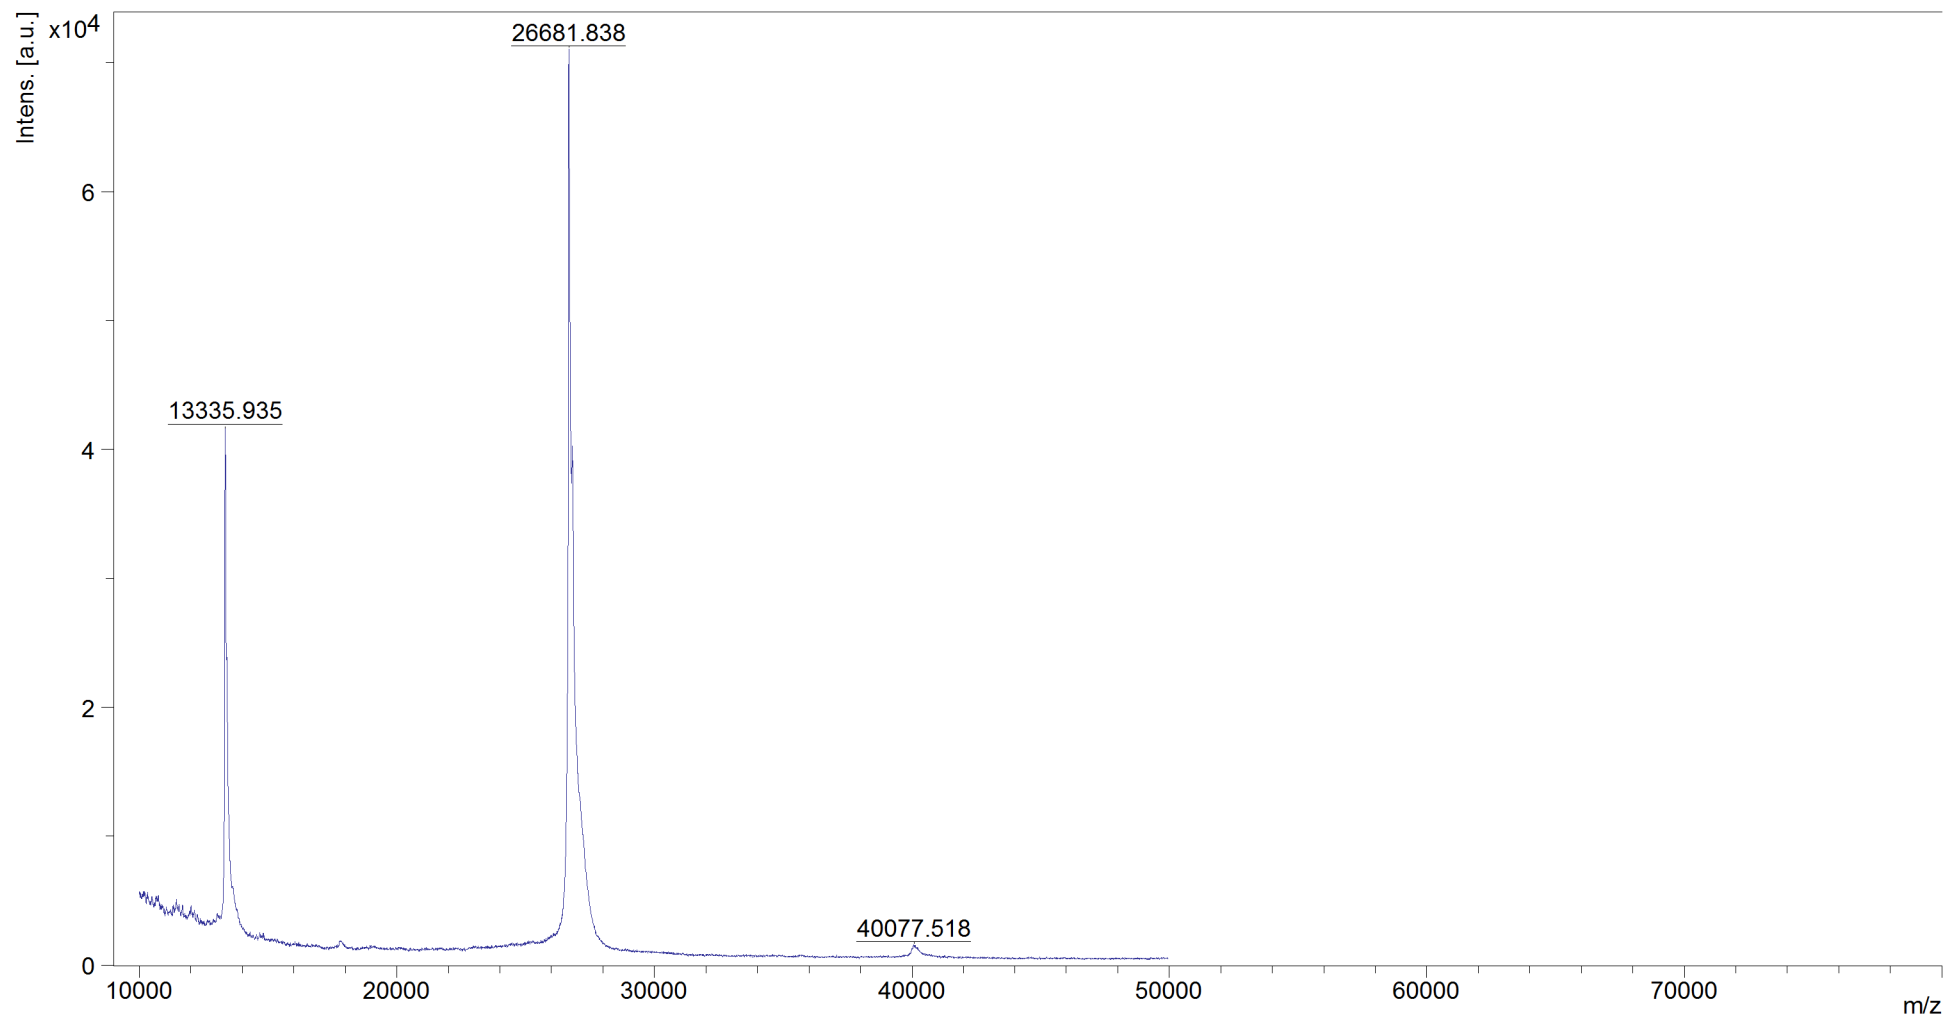

Mass spectrum of yTIM obtained in a MALDI-TOF/TOF AutoFlex Bruker instrument. 2,5 dihydroxybenzoic acid was used as matrix.
