# Supplementary material for: Complex kinetics and residual structure in the thermal unfolding of yeast triosephosphate isomerase
Source: PubMed Central journal article supplement (PMC4558838; doi:10.1186/s12858-015-0049-2), 2015-09-03
Supplement: 12858_2015_49_MOESM5_ESM.pdf [file 12858_2015_49_MOESM5_ESM.pdf]

## Additional file 5

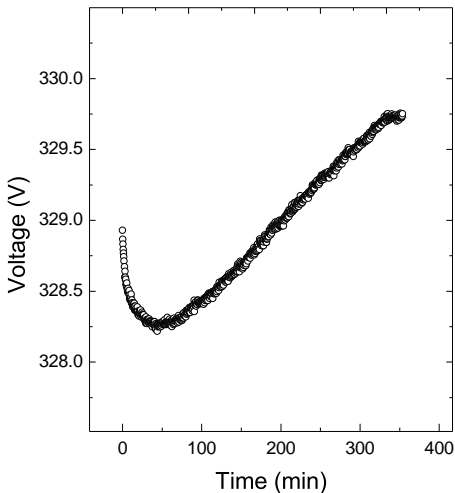

Kinetics of  $\gamma$ TIM unfolding as detected by light absorption (220 nm). Data shown correspond to an experiment, carried out at 54.5 °C and pH 8.0, in which the voltage applied to phototube of the CD instrument was monitored as a function of time.
