# Supplementary material for: Complex kinetics and residual structure in the thermal unfolding of yeast triosephosphate isomerase
Source: PubMed Central journal article supplement (PMC4558838; doi:10.1186/s12858-015-0049-2), 2015-09-03
Supplement: 12858_2015_49_MOESM7_ESM.pdf [file 12858_2015_49_MOESM7_ESM.pdf]

## Additional file 7

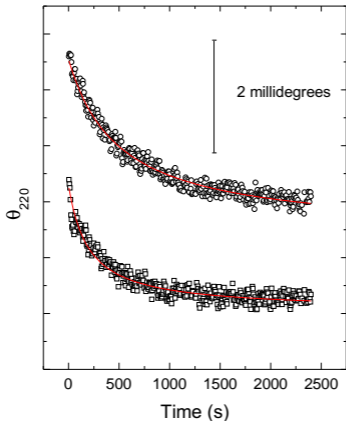

Refolding kinetics of yTIM as followed by far UV-CD. Data shown correspond to pH6.7 (lower trace) and pH8.0 (upper trace). Native yTIM samples ( $10\mu\text{g}/\text{mL}$ ) were allowed to unfold for 10 min at  $63.0^\circ\text{C}$ , cooled down to  $42.0^\circ\text{C}$  (see Methods) and the ellipticity was then registered. Red lines are least-squares fits of a second-order kinetics equation (see reference 15) to experimental data. Values of the rate constants determined from fit were  $6900$  (pH 6.7) and  $2700$  (pH 8.0)  $\text{s}^{-1}\text{M}^{-1}$ .
